# Supplementary material
Source: PubMed Central journal article supplement (PMC7038296)
Supplement: AAC.01841-19-s0002.pdf [file AAC.01841-19-s0002.pdf]

# Using the Hidden Markov Model to Assign SANC Residue Numbers

**Note:** HMMER3 (<http://hmmer.org/>) runs natively only on UNIX compatible operating systems, including Linux and macOS. Windows users will need to install additional software to run HMMER3. The developer provides an excellent user manual (<http://eddylab.org/software/hmmer/Userguide.pdf>) and your institution's IT department may be able to help with installation.

## Searching the Model and Assigning SANC Residue Numbers

1. Save the HMM file and a text file containing the protein sequence of interest (In this example, "Your\_sequence" in the file "Your\_sequence.fa") in FASTA format in your directory of choice.
2. Navigate to the appropriate directory in the terminal and enter the following:

```
hmmsearch SANC_Numbering.hmm Your_sequence.fa
```

3. Look for the portion of the output titled "Alignments for each domain:"

```
SANC_Numbering 4 kekelkavvdaaikp1...lkkqkipGmavavivdgkkhyfnyGvasketkpvvt 55
+++lka vdaa++p+ +k+++ipG++ +g++hyf+yG+aske++++vt+
Your_sequence 30 PADRLKALVDAAVQPVQQMKANDIPGLS----LKGEPHYFSYGLASKEDGRRVT 80
578899*****99866688899***86...69***** PP
```

4. Use the numbers from either end of the "SANC\_Numbering" lines as a starting point
  - a. Dots in "SANC\_Numbering" indicate insertions in "Your\_sequence" compared to the SANC numbering scheme
    - i. In this example, the three inserted Gln residues would be 19a, 19b, and 19c
  - b. Dashes in "Your\_sequence" indicate deletions in "Your\_sequence" compared to the SANC numbering scheme
    - i. In this example, the deleted residues are: 30, 31, 32, and 33

## Important Considerations

- Numbering residues of novel AmpC enzymes in this manner helps to remove ambiguity as to the location of insertions and deletions under the SANC numbering scheme
- Our HMM does not determine the site of signal peptide cleavage and will "ignore" residues not likely part of the mature enzyme. Use SignalP 5.0 (<http://www.cbs.dtu.dk/services/SignalP-5.0/>) or another tool to determine signal peptides
- Our HMM will only assign numbers to residues 7 through 360 (this is a limitation of the process used to generate the model) and residues outside this range will need to be manually assigned (although exact alignment is generally less crucial in these regions)
  - Residues downstream of 361 are numbered in sequence
  - Residues upstream of 4 are numbered down to 0 and letters appended if needed
